# Supplementary material for: Incidence dynamics and investigation of key interventions in a dengue outbreak in Ningbo City, China
Source: PLoS Negl Trop Dis. 2019 Aug 15;13(8):e0007659. doi: 10.1371/journal.pntd.0007659 (PMC6711548; doi:10.1371/journal.pntd.0007659)
Supplement: S1 Table — (XLSX) [file pntd.0007659.s002.xlsx]

## Sheet: Sheet1
Name of the 25 viruses	No.
DENV-1/NB/NJX-1/2018	MK203763
DENV-1/NB/NJX-2/2018	MK203764
DENV-1/NB/NJX-3/2018	MK203765
DENV-1/NB/NJX-4/2018	MK203766
DENV-1/NB/NJX-5/2018	MK203767
DENV-1/NB/NJX-6/2018	MK203768
DENV-1/NB/NJX-7/2018	MK203769
DENV-1/NB/NJX-8/2018	MK203770
DENV-1/NB/NJX-9/2018	MK203771
DENV-1/NB/NJX-10/2018	MK203772
DENV-1/NB/NJX-11/2018	MK203773
DENV-1/NB/NJX-12/2018	MK203774
DENV-1/NB/NJX-13/2018	MK203775
DENV-1/NB/NJX-14/2018	MK203776
DENV-1/NB/NJX-15/2018	MK203777
DENV-1/NB/NJX-16/2018	MK203778
DENV-1/NB/NJX-17/2018	MK203779
DENV-1/NB/NJX-18/2018	MK203780
DENV-1/NB/NJX-19/2018	MK203781
DENV-1/NB/NJX-20/2018	MK203782
DENV-1/NB/NJX-21/2018	MK203783
DENV-1/NB/NJX-22/2018	MK203784
DENV-1/NB/NJX-23/2018	MK203785
DENV-1/NB/NJX-24/2018	MK203786
DENV-1/NB/WHQ/2018	MK764265
